# Supplementary material for: Simulation of soft clay deformation behind draphram wall by linear equalization, FEM method
Source: Springer Nature journal article supplement (doi:10.1007/s10484-024-09624-7), 2005-04-01
Supplement: 10484_2024_9624_MOESM1_ESM.pdf [file 10484_2024_9624_MOESM1_ESM.pdf]

## Appendix A Supplementary Data

**Table A1** Demographic and Baseline Characteristics by Group (N=38)

|                      | <b>Total</b> | <b>Control</b>  | <b>HRVB</b>     | <b>t</b> | <b>p</b> |
|----------------------|--------------|-----------------|-----------------|----------|----------|
|                      | mean (SD)    | mean (SD)       | mean (SD)       |          |          |
| Age                  | 34.9 (10.3)  | 33.6 (6)        | 36.3 (13.4)     | -0.78    | .44      |
| Body Mass Index      | 25.7 (4.7)   | 25.6 (5.1)      | 25.8 (4.3)      | -0.13    | .90      |
| <b>PANAS</b>         |              |                 |                 |          |          |
| Positive Affect      | 24.4 (7.9)   | 26.2 (6.6)      | 22.5 (8.9)      | 1.45     | .16      |
| Negative Affect      | 8.95 (6.5)   | 8.7 (5.9)       | 9.2 (7.2)       | -0.20    | .84      |
| <b>DASS-21</b>       |              |                 |                 |          |          |
| Depression           | 1.58 (1.5)   | 1.63 (1.5)      | 1.53 (1.5)      | 0.22     | .83      |
| Anxiety              | 2.2 (1.6)    | 2.2 (1.5)       | 2.1 (1.5)       | 0.21     | .84      |
| Stress               | 1.1 (1.4)    | 1.1 (1.4)       | 1.1 (1.4)       | 0.00     | 1.0      |
| <b>PSQI</b>          |              |                 |                 |          |          |
| Sleep Quality        | 6.66 (3.4)   | 7.21 (3.7)      | 6.11 (3.1)      | 1.0      | .32      |
| <b>IPAQ</b>          |              |                 |                 |          |          |
| MET                  | 1547 (2196)  | 1092.3 (1152)   | 2002 (2855.3)   | -1.29    | .21      |
| kCal                 | 1848 (2765)  | 1198.8 (1068.3) | 2497.3 (3699.5) | -1.47    | .16      |
| <b>HRV Time</b>      |              |                 |                 |          |          |
| MeanRR               | 783 (104)    | 766 (84)        | 800 (121)       | -1.0     | .32      |
| RMSSD                | 46 (49)      | 52 (44)         | 40 (33)         | 0.97     | .34      |
| SDNN                 | 60.4 (33)    | 61 (36)         | 59 (31)         | 0.18     | .86      |
| <b>HRV Frequency</b> |              |                 |                 |          |          |
| LF Power             | 1557 (2799)  | 1949 (3277)     | 1165 (2246)     | 0.86     | .40      |
| HF Power             | 1266 (1707)  | 1368 (1856)     | 1164 (1588)     | 0.36     | .72      |
| LF/HF                | 1.8 (1.6)    | 2.1 (1.9)       | 1.6 (1.3)       | 0.97     | .34      |
| Total Power          | 3691 (4992)  | 4308 (5820)     | 3075 (4068)     | 0.76     | .45      |

**Table A2** Pearson Correlation Coefficients for HRV Measures and Affective States at Baseline

|                 | <b>Attentiveness</b> |          | <b>Fatigue</b> |          | <b>Serenity</b> |          |
|-----------------|----------------------|----------|----------------|----------|-----------------|----------|
|                 | <b>r</b>             | <b>P</b> | <b>r</b>       | <b>P</b> | <b>r</b>        | <b>P</b> |
| <b>RMSSD</b>    | .08                  | .61      | -.19           | .24      | .22             | .19      |
| <b>MeanRR</b>   | -.13                 | .42      | .30            | .06      | .44             | .01      |
| <b>SDNN</b>     | .16                  | .35      | -.13           | .43      | .21             | .20      |
| <b>HF Power</b> | .08                  | .64      | -.11           | .53      | .15             | .36      |
